# Supplementary material for: Low-dimensional HfS2as SO2adsorbent and gas sensor: effect of water and sulfur vacancies
Source: Royal Society of Chemistry journal article supplement (doi:10.1039/d1cp04069c), 2021-01-01
Supplement: d1cp04069c1.pdf [file d1cp04069c1.pdf]

## Electronic Supplementary Information (ESI)

# Low-dimensional HfS<sub>2</sub> as SO<sub>2</sub> adsorbent and gas sensor: Effect of water and sulfur vacancies

Amina Bouheddadj,<sup>a</sup> Tarik Ouahrani<sup>\*a</sup>, Wilfried G. Kanhounon<sup>b</sup>, Reda M. Boufatah<sup>a</sup>,  
Sumeya Bedrane<sup>c</sup>, Michael Badawi<sup>d</sup>, and Ángel Morales-García<sup>\*e</sup>

---

## CONTENTS

- **Analysis of water influence on 1T-HfS<sub>2</sub> monolayer**
- **Figure S1** : views of the most stable active sites used in the adsorption of H<sub>2</sub>O molecule, The H<sub>2</sub>O molecule is depicted with blue and white spheres which correspond to oxygen and hydrogen atoms.
- **Table S1** The calculated electronic contribution for the S/O exchange reaction from the reference surface  $\Delta E_n$ .  $E_1$  is the energy required to perform the  $n$ th exchange (eV),  $E_2$  is the energy per exchanged oxygen atom  $\Delta E_n/n$  (kJ mol<sup>-1</sup>). Bridge (B), top on S atom (S) and top on Hf atom (Hf) and hexagon (H) positions represent the active sites tested.
- **Figure S2** : View for the most stable geometry of HfS<sub>2-x</sub>O<sub>x</sub> structures.
- **Figure S3** : Side and top views of the most stable configuration of Sv-2D-HfS<sub>2</sub> adsorbed with SO<sub>2</sub> molecule. The SO<sub>2</sub> molecule is depicted with yellow and blue spheres which correspond to sulfur and oxygen atoms.
- **Figure S4** : The calculated band gap of (a) 2D-HfS<sub>2</sub>, (b) HfS<sub>2-x</sub>O<sub>x</sub> and (c) Sv-2D-HfS<sub>2</sub> at HSE level. Noted that in (a) we also give in orange the plot of band structure at the HSE+SOC level.
- **Figure S5** : Band structure plot at HSE06 level for (a) 2D-HfS<sub>2</sub>@SO<sub>2</sub>, (b) Sv-2D-HfS<sub>2</sub>@SO<sub>2</sub> and (c) HfS<sub>2-x</sub>O<sub>x</sub>@SO<sub>2</sub>
- **Figure S6** : Partial densities of states of (a) 1T-HfS<sub>2</sub>, (b) Sv-2D-HfS<sub>2</sub> and (c) isolated SO<sub>2</sub> molecule at HSE level.
- **Figure S7**: NCI isosurfaces ( $s(\mathbf{r})=0.23$  a.u.) of the (a) HfS<sub>2-x</sub>O<sub>x</sub>@H<sub>2</sub>O (b) Sv-2D-HfS<sub>2</sub>@H<sub>2</sub>O structures.

---

<sup>a</sup>Laboratoire de Physique Théorique, Université de Tlemcen 1300; E-mail: [tarik\\_ouahrani@yahoo.fr](mailto:tarik_ouahrani@yahoo.fr)

<sup>b</sup>Laboratoire de Chimie Théorique et de Spectroscopie Moléculaire (LACTHESMO) Université d'Abomey-Calavi, Bénin

<sup>c</sup>Laboratory of Catalysis and Synthesis in Organic Chemistry, University of Tlemcen, BP 119, Tlemcen, Algeria

<sup>d</sup> Université de Lorraine and CNRS, LPCT, UMR 7019, 54506 Vandoeuvre-lès-Nancy, France

<sup>e</sup>Departament de Ciència de Materials i Química Física & Institut de Química Teòrica i Computacional (IQTCUB) Universitat de Barcelona, c/Martí Franquès 111, 08028 Barcelona, Spain

---

## Analysis of water influence on 1T-HfS<sub>2</sub> monolayer

To simulate the effect of water, we consider that H<sub>2</sub>O can deposit oxygen atoms on the unsaturated hafnium atoms and modify the surface state according to the following equation<sup>1,2</sup>:

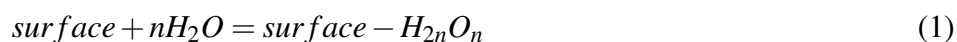

Sulfur/oxygen exchanges can take place on the stable reference surface

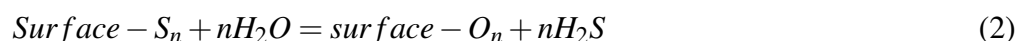

Taking water as the oxygen source, successive exchanges were studied. Gibbs free energy of Reaction (1), for example, was computed according to:

$$\Delta_r G = \mu(\text{Surface} - \text{O}_n) - \mu(\text{Surface} - \text{S}_n) + n\mu(\text{H}_2\text{S}) - n\mu(\text{H}_2\text{O}) \quad (3)$$

Assuming that the difference between the chemical potential of solid phases can be approximated by the difference in their electronic energy<sup>1,2</sup>:

$$\Delta_r G = \Delta_r G^0 + nRT \ln 10 \log \frac{P(\text{H}_2\text{S})}{P(\text{H}_2\text{O})} \quad (4)$$

Here  $\Delta_r G^0$  being equal to  $\Delta E_n + \Delta\mu^0(T)$ <sup>3,4</sup>. ( $\Delta\mu^0(T)$ ) includes the effect of temperature by accounting for the vibrational contribution of the system in the following equation :

$$\Delta\mu^0(T) = \Delta ZPE + \Delta H_{\text{vib}} + \Delta H_{\text{rot}} + \Delta H_{\text{tr}} - T(\Delta S_{\text{vib}} + \Delta S_{\text{rot}} + \Delta S_{\text{tr}})$$

and  $\Delta E_n$  being the electronic energy contribution to the S/O exchange reaction defined as  $\Delta E_n = E(\text{Surface} - \text{O}_n) - E(\text{Surface} - \text{S}_n) + nE(\text{H}_2\text{O}) + nH_2\text{S}$

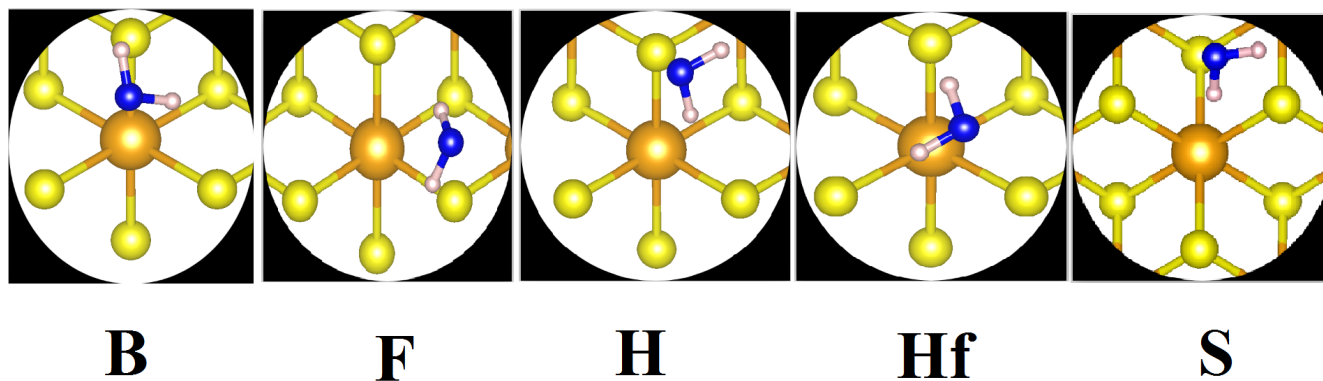

**Figure S1** : views of the most stable active sites used in the adsorption of H<sub>2</sub>O molecule, The H<sub>2</sub>O molecule is depicted with blue and white spheres which correspond to oxygen and hydrogen atoms.

**Table S1** : The calculated electronic contribution for the S/O exchange reaction from the reference surface  $\Delta E_n$ .  $E_1$  is the energy required to perform the  $n^{th}$  exchange ( $\text{kJ mol}^{-1}$ ),  $E_2$  is the energy per exchanged oxygen atom  $\Delta E_n/n$  ( $\text{kJ mol}^{-1}$ ). Bridge (B), top on S atom (S), top on Hf atom (Hf), hexagon (H) and (F) positions represent the active sites tested.

| S site | H site | B site | Hf site | F site |
|--------|--------|--------|---------|--------|
| -12.6  | -16.4  | -17.4  | -20.3   | -16.4  |

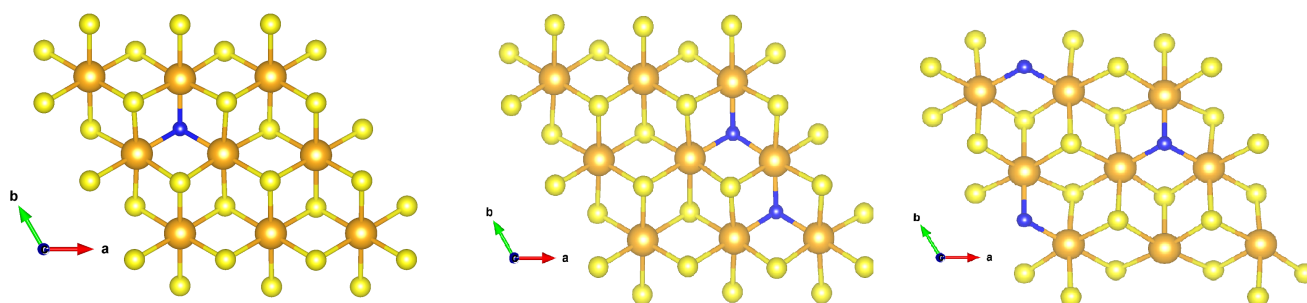

**Figure S2** : View for the most stable geometry of HfS<sub>2-x</sub>O<sub>x</sub> structures.

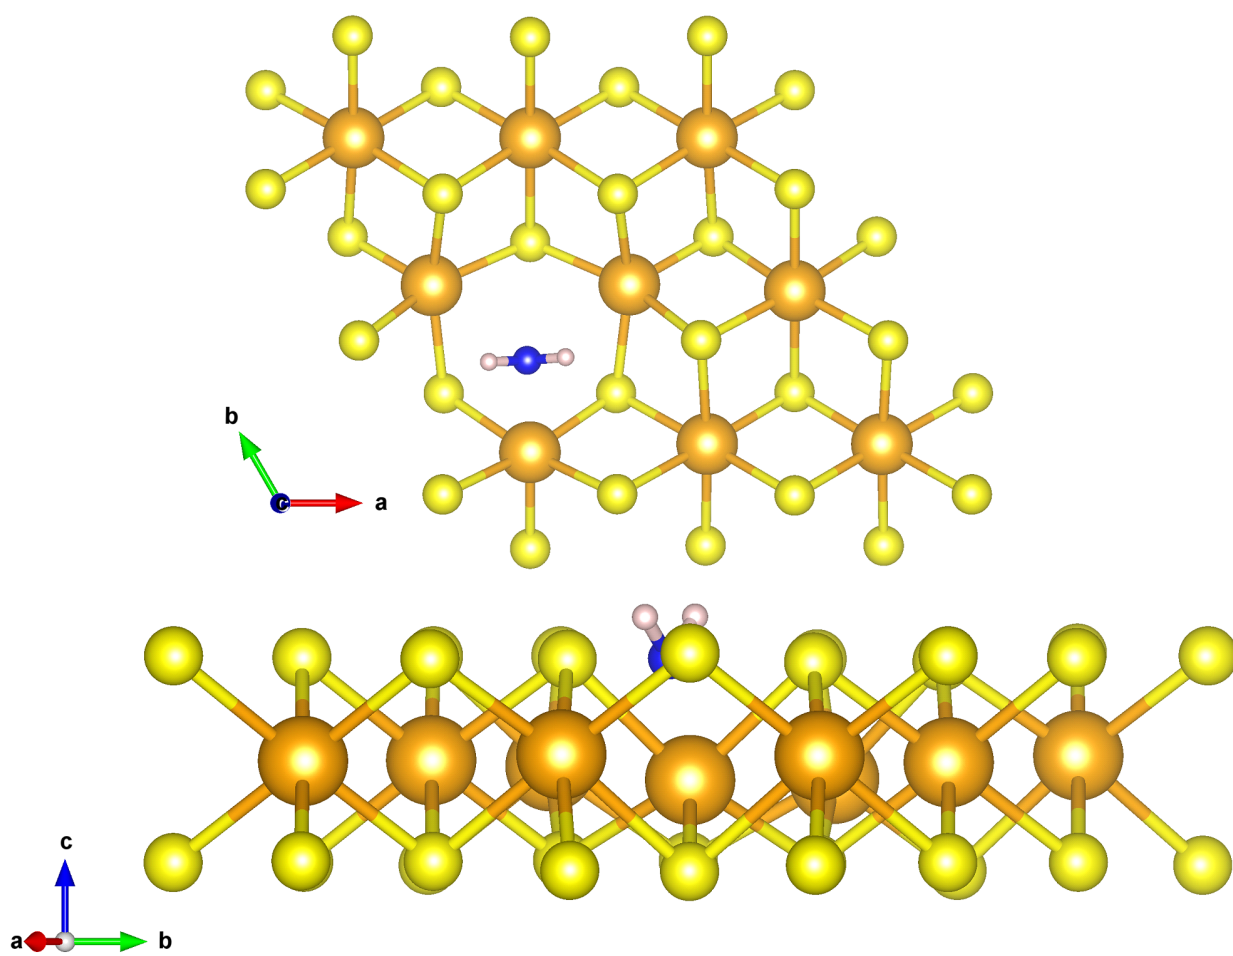

**Figure S3** : Side and top views of the most stable configuration of Sv-2D-HfS<sub>2</sub> adsorbed with SO<sub>2</sub> molecule. The SO<sub>2</sub> molecule is depicted with yellow and blue spheres which correspond to sulfur and oxygen atoms.

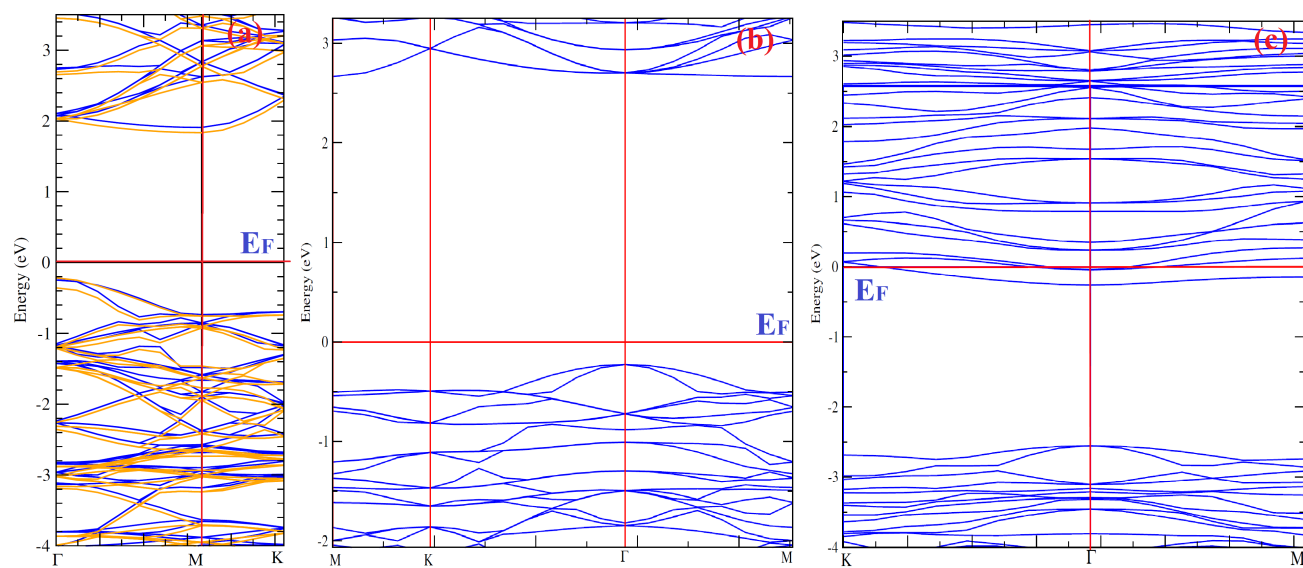

**Figure S4** : The calculated band gap of (a) 2D-HfS<sub>2</sub>, (b) HfS<sub>2-x</sub>O<sub>x</sub> and (c) Sv-2D-HfS<sub>2</sub> at HSE level. Noted that in (a) we also give in orange the plot of band structure at the HSE+SOC level.

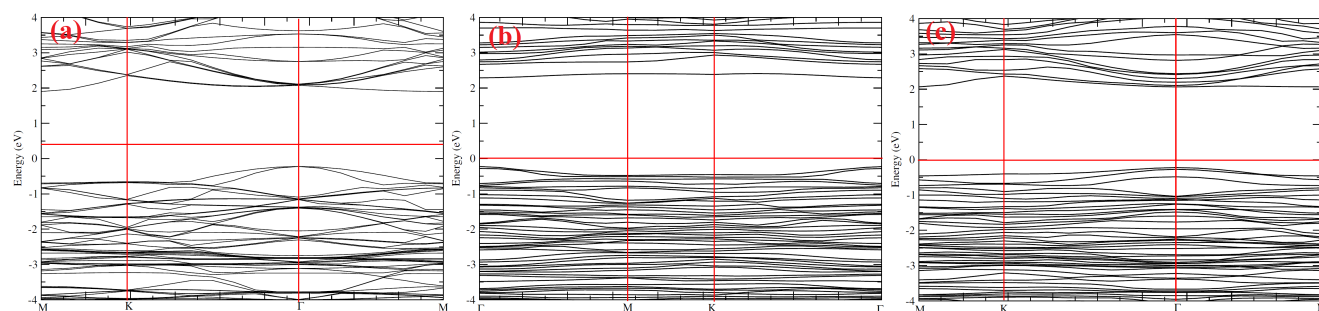

**Figure S5** : Band structure plot at HSE06 level for (a) 2D-HfS<sub>2</sub>@SO<sub>2</sub>, (b) Sv-2D-HfS<sub>2</sub>@SO<sub>2</sub> and (c) HfS<sub>2-x</sub>O<sub>x</sub>@SO<sub>2</sub>

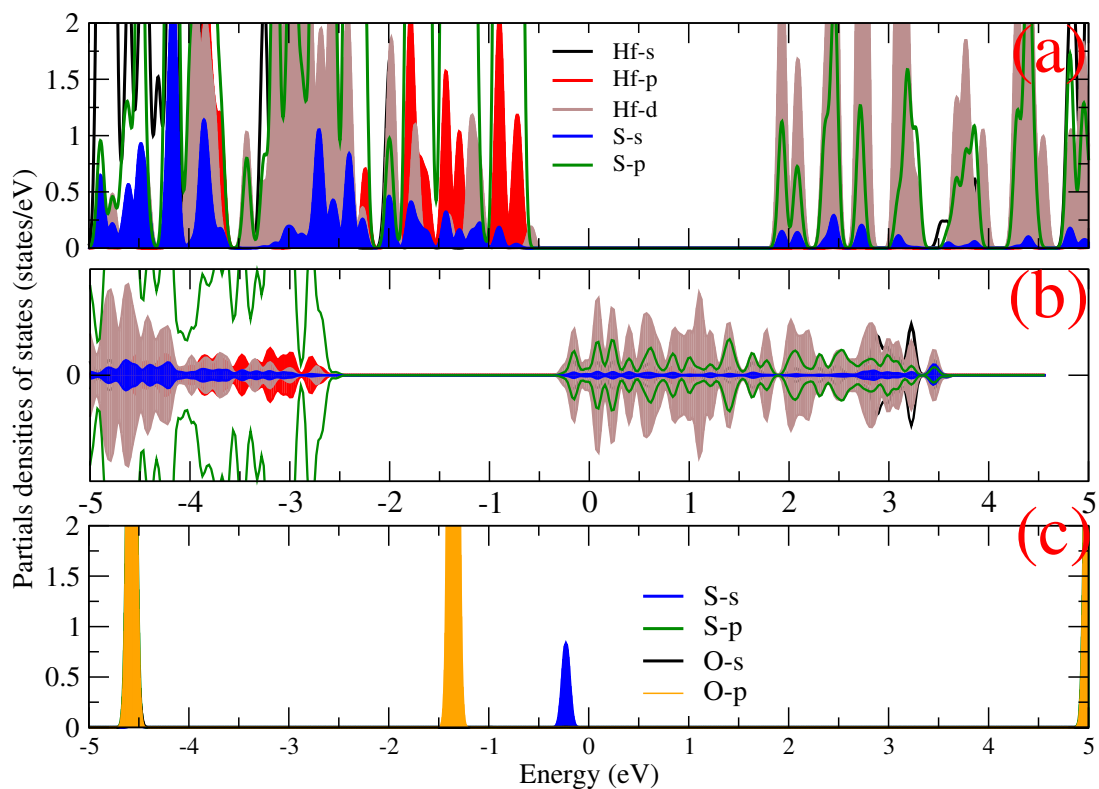

**Figure S6** : Partial densities of states of (a) T1-HfS<sub>2</sub>, (b) Sv-2D-HfS<sub>2</sub> and (c) isolated SO<sub>2</sub> molecule at HSE level.

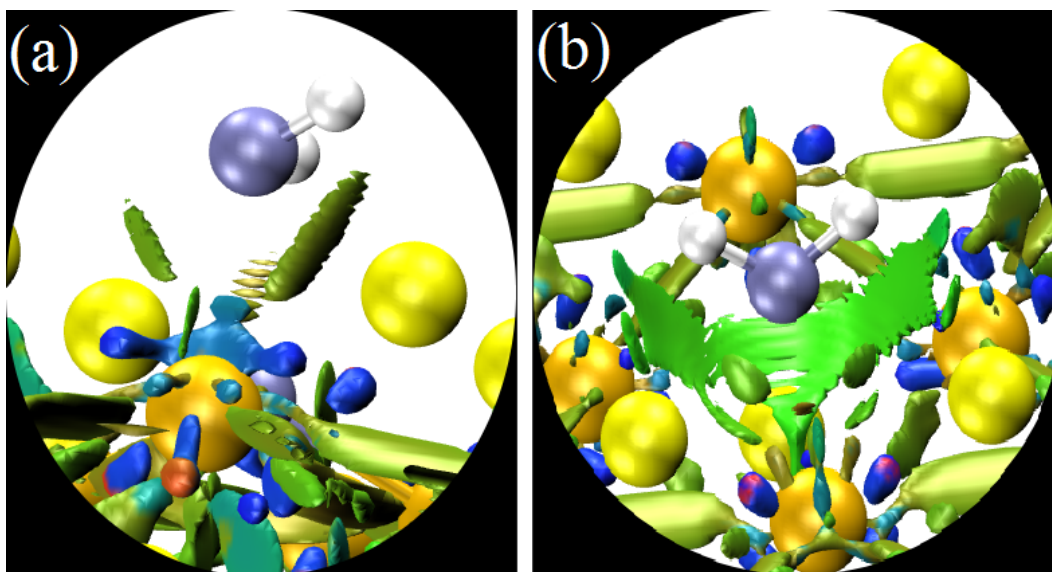

**Figure S7** : NCI isosurfaces ( $s(\mathbf{r})=0.23$  a.u.) of the (a) Sv-2D-HfS<sub>2</sub>@H<sub>2</sub>O (b) HfS<sub>2-x</sub>O<sub>x</sub>@H<sub>2</sub>O structures.

---

## References

- 1 Badawi, M.; Paul, J.F.; Cristol, S.; Payen, E.; Romero, Y.; Richard, F.; Brunet, S.; Lambert, D.; Portier, X.; Popov, A.; Kondratieva, E.; Goupil, J.M.; Fallah, J.El; Gilson, J.P.; Mariey, L.; Travert, A.; Maugée, F.; Effect of water on the stability of Mo and CoMo hydrodeoxygenation catalysts: A combined experimental and DFT study, *J. Catal.* **2011**, 282, 155-164 <https://doi.org/10.1016/j.jcat.2011.06.006>
- 2 F. Jensen, Introduction to Computational Chemistry (2007) 2nd Edition, John Wiley and Sons Ltd, page 433.
- 3 Loffreda, D. Theoretical insight of adsorption thermodynamics of multifunctional molecules on metal surfaces. *Surf. Sci.* **2006**, 600, 2103-2112. <https://doi.org/10.1016/j.susc.2006.02.045>
- 4 Badawi, M.; Cristol, S.; Paul, J. F.; Payen, E. DFT study of furan adsorption over stable molybdenum sulfide catalyst under HDO conditions. *C. R. Chimie.* **2009** 12, 754-761, <https://doi.org/10.1016/j.crci.2008.10.023>
